# Supplementary material for: Can Carob-Fruit-Extract-Enriched Meat Improve the Lipoprotein Profile, VLDL-Oxidation, and LDL Receptor Levels Induced by an Atherogenic Diet in STZ-NAD-Diabetic Rats?
Source: PubMed Central journal article supplement (PMC6413123; doi:10.3390/nu11020332), 2019-02-03
Supplement: nutrients-11-00332-s001.pdf [file nutrients-11-00332-s001.pdf]

## Supplementary

**Table S1.** Composition of the Restructured Meat (RM) incorporated into the experimental diets fed to male Wistar rats.

| Restructured meat components | Control-RM    | CFE-RM        |
|------------------------------|---------------|---------------|
| Protein, %                   | 13.1          | 13.1          |
| Fat, %                       | 38.3          | 38.3          |
| Water, %                     | 46.9          | 46.9          |
| Cholesterol, g/kg            | 0.74          | 0.74          |
| SFA/MUFA/PUFA ratio          | 41.2/43.5/8.5 | 41.2/43.5/8.5 |
| Ingredients                  |               |               |
| Lean pork, g/kg              | 663.1         | 663.1         |
| Lard, g/kg                   | 331.1         | 331.1         |
| Na, g/kg                     | 0.5           | 0.5           |
| STP, g/kg                    | 0.1           | 0.1           |
| Sodium nitrite, g/kg         | 1.2           | 1.2           |
| CFE, g/kg                    | 0.0           | 4             |
| Cellulose                    | 4             | 0.0           |

<sup>1</sup>Control Restructured Meat control (RM), Restructured Meat supplemented with CFE (CFE-RM). STP, sodium triphosphate.

**Figure S1.**

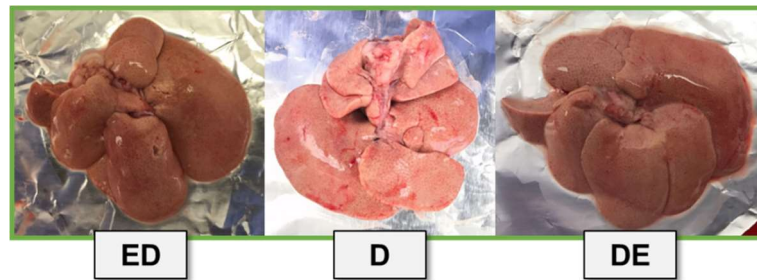

**Figure S1.** Macroscopic aspect of a representative liver of the experimental groups. Liver macroscopic aspect of the different diabetic groups fed the three experimental diets (n=8 rats/group). ED: rats fed the CFE-diet since the beginning of the study; D: rats fed the Chol-diet; DE: rats fed the CFE-diet when the diabetic state was confirmed.
